# Supplementary material
Source: PubMed Central journal article supplement (PMC6662918)
Supplement: NIHMS1022057-supplement-1.pdf [file NIHMS1022057-supplement-1.pdf]

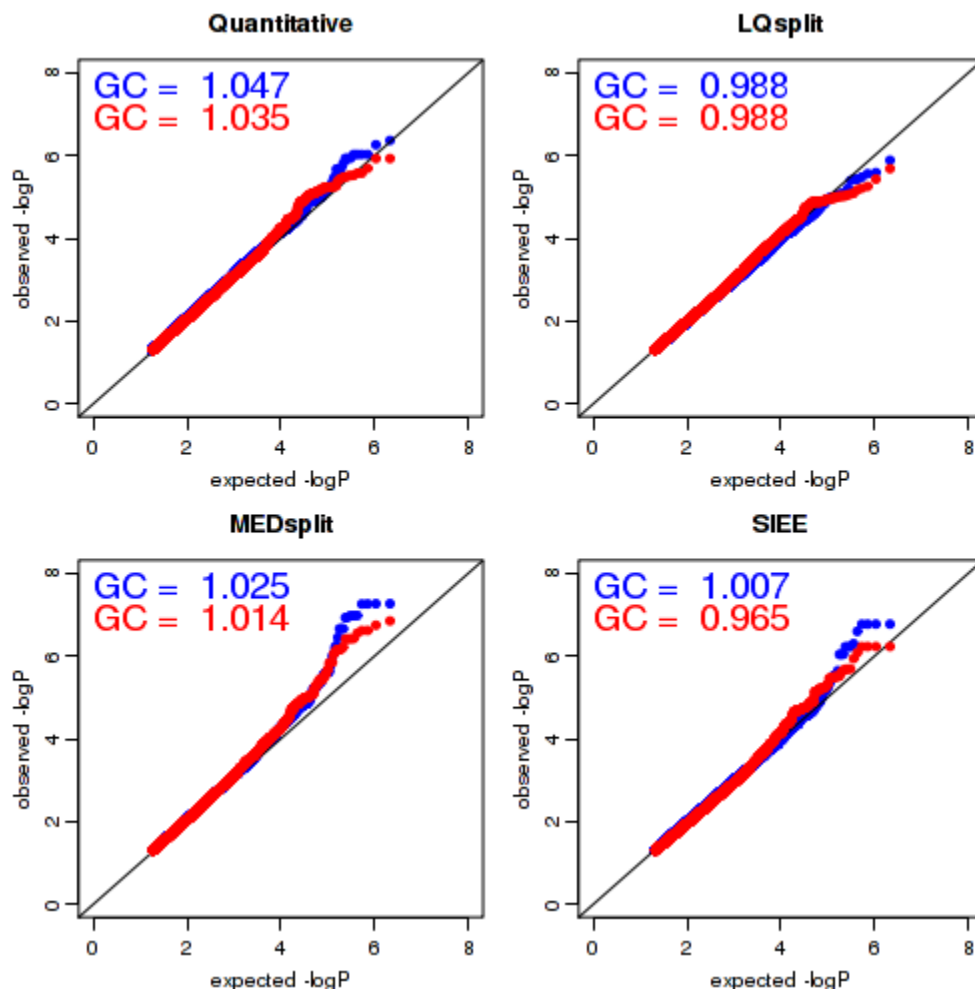

Figure S1. QQ plots by PA variables for SBP.  $\log_{10} P$ -values from the 1 DF interaction test are shown in blue and the 2 DF joint test are shown in red. Genomic control lambda (GC; same as  $\lambda$ ) is generally well controlled. See Table S6 for definition of abbreviations.

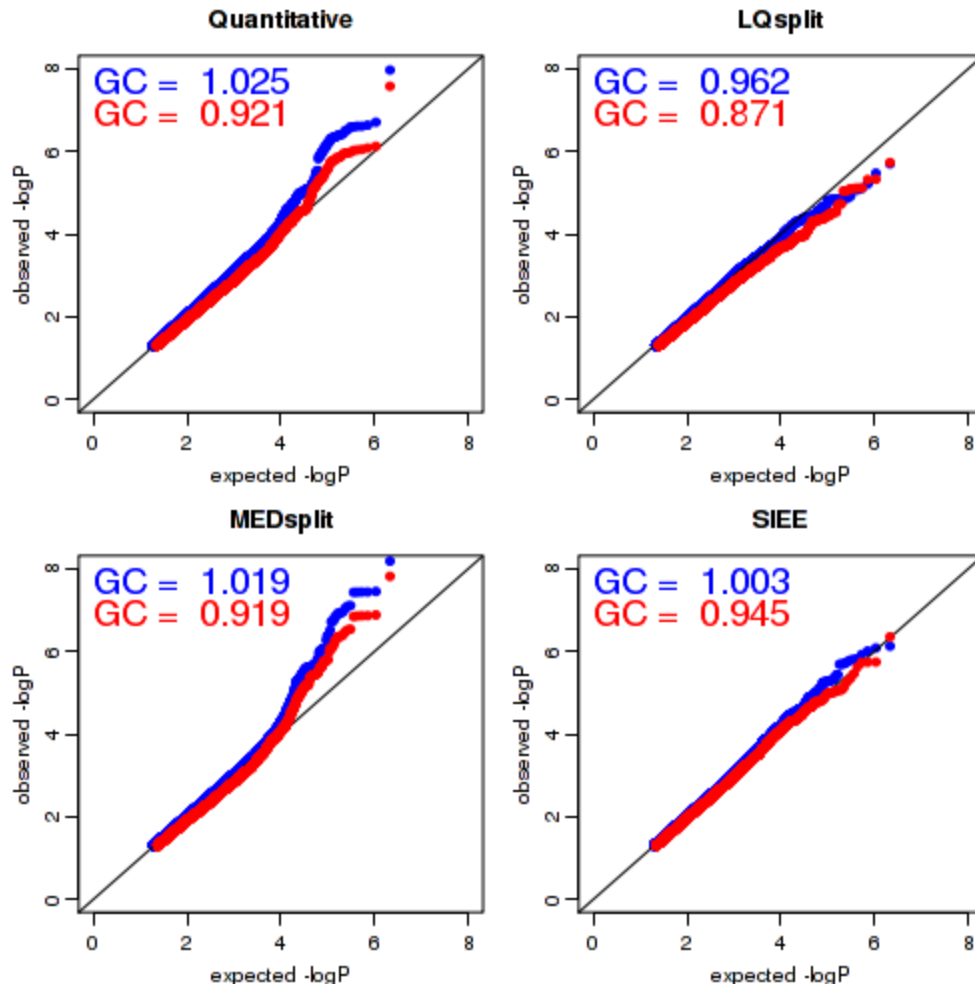

Figure S2. QQ plots by PA variables for DBP.  $\log_{10} P$ -values from the 1 DF interaction test are shown in blue and the 2 DF joint test are shown in red. Genomic control (GC) for the 2DF test is moderately deflated for the LQsplit PA variable. See Table S6 for definition of abbreviations.

Table S1. Total number of SNPs in sets used in the 4 analyses for each phenotype.

| <b>Phenotype</b> | <b>Quantitative</b> | <b>LQsplit</b> | <b>MEDsplit</b> | <b>SIEE</b> |
|------------------|---------------------|----------------|-----------------|-------------|
| SBP              | 2,144,171           | 2,144,171      | 2,144,143       | 2,144,462   |
| DBP              | 2,144,169           | 2,144,169      | 2,144,141       | 2,144,462   |

**Abbreviations:** SBP, systolic blood pressure; DBP, diastolic blood pressure;  
LQsplit, created by splitting Quantitative by the lower quartile of its distribution;  
MEDsplit, created by splitting Quantitative by the median of its distribution;  
SIEE, created by selecting individuals with Quantitative values in the lower and upper quartiles and excluding individuals intermediate between the lower and upper quartile.

Table S2. Top SNP hits for SBP detected using 2 DF joint test in all four analyses defined by PA variable.

| Chr:Position† | Loci Tag | EAF    | Imputation | $\beta_G$ | $\beta_{GE}$ | $P_{\beta_{GE}}$ | Joint 2-DF | PA variable  | Effect direction |
|---------------|----------|--------|------------|-----------|--------------|------------------|------------|--------------|------------------|
| 1:192857024   | 9        | 0.3136 | 0.9375     | 0.5007    | 1.5730       | 3.93E-03         | 6.16E-06   | LQsplit      | SYN              |
| 1:192857024   | 9        | 0.3097 | 0.9375     | 0.5170    | 0.7636       | 1.17E-02         | 2.49E-06   | SIEE         | SYN              |
| 2:197062178   | 11       | 0.9424 | 0.9886     | 2.6580    | -2.8310      | 3.19E-03         | 6.73E-06   | LQsplit      | ANT              |
| 2:197062178   | 11       | 0.9417 | 0.9886     | 3.6060    | -1.9190      | 1.63E-04         | 3.36E-06   | SIEE         | SYN              |
| 2:197062178   | 11       | 0.9424 | 0.9886     | 0.0512    | 0.2921       | 4.88E-03         | 3.02E-06   | Quantitative | NA               |
| 2:206880872   | 21       | 0.4030 | 0.9648     | 1.0530    | -0.2396      | 6.53E-06         | 6.51E-06   | Quantitative | NA               |
| 2:206969101   | 21       | 0.3625 | 0.8692     | -1.8270   | 1.4060       | 2.92E-06         | 7.07E-06   | SIEE         | SYN              |
| 2:218367315   | 19       | 0.0851 | 0.7696     | -3.2550   | 3.1210       | 9.11E-04         | 5.66E-06   | MEDsplit     | SYN              |
| 3:34818945    | 23       | 0.8573 | 0.9807     | 2.3930    | -1.6070      | 3.62E-05         | 6.96E-06   | SIEE         | SYN              |
| 4:157688802   | 8        | 0.4569 | 0.8888     | -0.9336   | 2.3790       | 8.75E-07         | 2.06E-06   | MEDsplit     | ANT              |
| 4:75035707    | 15       | 0.1780 | 0.7205     | 2.0620    | -1.9980      | 1.16E-02         | 3.71E-06   | LQsplit      | SYN              |
| 5:124653679   | 13       | 0.9128 | 0.8282     | -3.6490   | 2.4700       | 2.25E-06         | 3.37E-06   | SIEE         | SYN              |
| 5:1845474     | 28       | 0.0929 | 0.9862     | -1.7770   | 3.9530       | 8.72E-06         | 9.65E-06   | LQsplit      | ANT              |
| 5:1845474     | 28       | 0.0929 | 0.9862     | -2.4490   | 3.5090       | 8.34E-06         | 9.07E-06   | MEDsplit     | ANT              |
| 5:35044449    | 26       | 0.1237 | 0.7612     | -3.0880   | 0.4229       | 4.39E-06         | 8.61E-06   | Quantitative | NA               |
| 6:32328375    | 16       | 0.8522 | 0.9546     | 0.1765    | 2.0100       | 2.29E-03         | 5.33E-06   | MEDsplit     | SYN              |
| 6:32514451    | 16       | 0.8021 | 0.9976     | 2.1960    | -0.1737      | 6.03E-03         | 5.49E-06   | Quantitative | NA               |
| 7:130493617   | 2        | 0.0572 | 0.9714     | 0.1025    | -3.4720      | 3.34E-04         | 1.79E-07   | MEDsplit     | ANT              |
| 7:130493617   | 2        | 0.0572 | 0.9714     | -3.9620   | 0.3704       | 1.57E-03         | 3.06E-06   | Quantitative | NA               |
| 7:155831233   | 5        | 0.2567 | 0.7040     | 1.8910    | -3.3010      | 1.14E-07         | 6.73E-07   | MEDsplit     | ANT              |
| 7:20608418    | 25       | 0.5390 | 0.4167     | 0.9551    | -0.3127      | 8.08E-05         | 8.47E-06   | Quantitative | NA               |
| 7:43335541    | 6        | 0.2687 | 0.8381     | 2.2240    | -2.7660      | 1.82E-06         | 9.07E-07   | MEDsplit     | ANT              |
| 7:43335541    | 6        | 0.2687 | 0.8381     | -0.9940   | 0.2841       | 8.28E-06         | 2.03E-06   | Quantitative | NA               |
| 8:68259006    | 10       | 0.8670 | 0.3169     | -4.4120   | 0.6899       | 4.29E-07         | 2.66E-06   | Quantitative | NA               |
| 9:128252235   | 17       | 0.8785 | 0.9144     | 2.3460    | -1.5360      | 3.36E-02         | 8.47E-06   | MEDsplit     | SYN              |
| 9:128252235   | 17       | 0.8803 | 0.9144     | 2.6600    | -0.7072      | 9.54E-02         | 5.41E-06   | SIEE         | SYN              |
| 9:128274132   | 17       | 0.1298 | 0.9994     | -0.6771   | -0.1305      | 6.50E-02         | 5.63E-06   | Quantitative | NA               |
| 9:13620162    | 3        | 0.1937 | 0.9150     | -2.1030   | 1.8350       | 1.69E-07         | 5.86E-07   | SIEE         | SYN              |
| 9:13621427    | 3        | 0.1911 | 0.9153     | 2.1630    | -0.3375      | 9.38E-07         | 5.94E-06   | Quantitative | NA               |
| 9:13621992    | 3        | 0.1912 | 0.9157     | -1.6120   | 3.2460       | 5.40E-08         | 3.79E-07   | MEDsplit     | ANT              |
| 10:4618784    | 18       | 0.4122 | 0.9625     | 0.9921    | -2.4980      | 1.29E-06         | 5.56E-06   | LQsplit      | ANT              |
| 10:82575930   | 14       | 0.0607 | 0.9823     | 3.4420    | -0.6237      | 2.86E-01         | 3.48E-06   | SIEE         | SYN              |

|             |    |        |        |         |         |          |          |              |     |
|-------------|----|--------|--------|---------|---------|----------|----------|--------------|-----|
| 10:97298997 | 24 | 0.9475 | 0.9197 | -1.3290 | 4.5030  | 1.36E-05 | 8.23E-06 | MEDsplit     | ANT |
| 12:71678350 | 12 | 0.2599 | 0.9759 | 0.4874  | -2.1890 | 4.69E-05 | 3.11E-06 | MEDsplit     | ANT |
| 12:73799585 | 7  | 0.0949 | 0.9745 | -2.6010 | 4.0060  | 5.54E-07 | 1.49E-06 | MEDsplit     | ANT |
| 12:93573610 | 27 | 0.3999 | 0.9307 | -0.2573 | -0.1205 | 2.53E-02 | 8.80E-06 | Quantitative | NA  |
| 14:75651645 | 1  | 0.1075 | 0.8972 | 3.2580  | -3.9240 | 6.21E-07 | 1.41E-07 | MEDsplit     | ANT |
| 14:75651645 | 1  | 0.1086 | 0.8972 | 3.4880  | -2.0590 | 5.98E-06 | 1.15E-06 | SIEE         | SYN |
| 14:75651645 | 1  | 0.1075 | 0.8972 | -1.2910 | 0.4073  | 7.62E-06 | 1.18E-06 | Quantitative | NA  |
| 14:92288711 | 20 | 0.8803 | 0.5242 | 3.5470  | -2.2650 | 1.52E-05 | 5.91E-06 | SIEE         | SYN |
| 19:52704281 | 22 | 0.1334 | 0.8932 | 2.4380  | -3.3430 | 5.05E-06 | 6.70E-06 | MEDsplit     | ANT |
| 19:8012521  | 4  | 0.4171 | 0.4590 | -1.9050 | 0.6698  | 3.57E-01 | 2.07E-06 | LQsplit      | SYN |
| 19:8012521  | 4  | 0.4171 | 0.4590 | -2.3400 | 1.1840  | 7.99E-02 | 6.05E-07 | MEDsplit     | SYN |
| 19:8012521  | 4  | 0.4171 | 0.4590 | -1.1340 | -0.0954 | 2.16E-01 | 1.18E-06 | Quantitative | NA  |

**Abbreviations and symbols:**

†Genome build: NCBI build 36.

EAF: effect allele frequency

$\beta_G$  is the genetic main effect

$\beta_{GE}$  is the GxPA interaction effect

$P_{\beta_{GE}}$  is the 1-DF test *P*-value

Joint 2-DF refers to *P*-values from the Wald 2-DF joint test for  $\beta_G$  and  $\beta_{GE}$

Effect direction: based on the similarity in the direction of  $\beta_G$

and the sum of  $\beta_G$  and  $\beta_{GE}$  to get an estimate of effect size in the exposed group

SYN indicates same effect direction between exposure groups

ANT indicates opposite effect direction between exposure groups

Table S3. Top SNP hits for SBP detected using 1 DF interaction test in all four analyses defined by PA variable.

| Chr:Position <sup>†</sup> | Loci Tag | EAF    | Imputation | $\beta_G$ | $\beta_{GE}$ | P_ $\beta_{GE}$ | PA variable  | Effect direction |
|---------------------------|----------|--------|------------|-----------|--------------|-----------------|--------------|------------------|
| 1:117395987               | 20       | 0.3962 | 0.4295     | 1.2540    | -3.3810      | 8.31E-06        | LQsplit      | ANT              |
| 1:224575268               | 21       | 0.3041 | 0.8441     | 1.3400    | -2.4030      | 9.38E-06        | MEDsplit     | ANT              |
| 2:206880872               | 12       | 0.4030 | 0.9648     | 1.0530    | -0.2396      | 6.53E-06        | Quantitative | NA               |
| 2:206975861               | 12       | 0.3625 | 0.8528     | -1.8310   | 1.4200       | 2.87E-06        | SIEE         | SYN              |
| 2:68014962                | 11       | 0.3215 | 0.8689     | 0.8404    | -2.6820      | 2.57E-06        | LQsplit      | ANT              |
| 4:157688802               | 6        | 0.4569 | 0.8888     | -0.9336   | 2.3790       | 8.75E-07        | MEDsplit     | ANT              |
| 5:124653679               | 9        | 0.9128 | 0.8282     | -3.6490   | 2.4700       | 2.25E-06        | SIEE         | SYN              |
| 5:1845474                 | 19       | 0.0929 | 0.9862     | -1.7770   | 3.9530       | 8.72E-06        | LQsplit      | ANT              |
| 5:1845474                 | 19       | 0.0929 | 0.9862     | -2.4490   | 3.5090       | 8.34E-06        | MEDsplit     | ANT              |
| 5:1845474                 | 19       | 0.0955 | 0.9862     | -1.9490   | 2.0510       | 8.07E-06        | SIEE         | ANT              |
| 5:35044449                | 15       | 0.1237 | 0.7612     | -3.0880   | 0.4229       | 4.39E-06        | Quantitative | NA               |
| 6:39163494                | 14       | 0.0972 | 0.8389     | 0.9100    | -3.7340      | 4.06E-06        | LQsplit      | ANT              |
| 7:155831233               | 2        | 0.2567 | 0.7040     | 1.8910    | -3.3010      | 1.14E-07        | MEDsplit     | ANT              |
| 7:155842801               | 2        | 0.2277 | 0.6765     | -1.9650   | 0.3401       | 3.62E-06        | Quantitative | NA               |
| 7:17656736                | 22       | 0.2609 | 0.9657     | -1.4440   | 0.2601       | 9.55E-06        | Quantitative | NA               |
| 7:43402308                | 7        | 0.0965 | 0.7328     | 3.2690    | -4.5770      | 1.00E-06        | MEDsplit     | ANT              |
| 7:43402308                | 7        | 0.0965 | 0.7328     | -2.2680   | 0.5051       | 3.20E-06        | Quantitative | NA               |
| 8:68259006                | 3        | 0.8670 | 0.3169     | -4.4120   | 0.6899       | 4.29E-07        | Quantitative | NA               |
| 9:13621992                | 1        | 0.1912 | 0.9157     | 2.1630    | -0.3374      | 9.36E-07        | Quantitative | NA               |
| 9:13622110                | 1        | 0.1912 | 0.9158     | -1.6120   | 3.2450       | 5.39E-08        | MEDsplit     | ANT              |
| 9:13622110                | 1        | 0.1938 | 0.9158     | -2.1030   | 1.8340       | 1.68E-07        | SIEE         | SYN              |
| 10:4618581                | 8        | 0.4501 | 0.9366     | 1.1870    | -1.2770      | 3.98E-06        | SIEE         | ANT              |
| 10:4618784                | 8        | 0.4122 | 0.9625     | 0.9921    | -2.4980      | 1.29E-06        | LQsplit      | ANT              |
| 10:84414058               | 13       | 0.7458 | 0.9719     | 1.6940    | -1.4760      | 3.60E-06        | SIEE         | SYN              |
| 12:73799585               | 4        | 0.0949 | 0.9745     | -2.6010   | 4.0060       | 5.54E-07        | MEDsplit     | ANT              |
| 14:75602180               | 5        | 0.8477 | 0.9997     | 1.4240    | -0.3240      | 5.64E-06        | Quantitative | NA               |
| 14:75651645               | 5        | 0.1075 | 0.8972     | 3.2580    | -3.9240      | 6.21E-07        | MEDsplit     | ANT              |
| 14:75651645               | 5        | 0.1086 | 0.8972     | 3.4880    | -2.0590      | 5.98E-06        | SIEE         | SYN              |
| 14:76167428               | 17       | 0.8312 | 0.9663     | 2.0200    | -1.6800      | 6.81E-06        | SIEE         | SYN              |
| 15:85878957               | 16       | 0.1718 | 0.9992     | -1.0120   | 2.9950       | 6.26E-06        | LQsplit      | ANT              |
| 19:17647792               | 18       | 0.2830 | 0.3661     | 2.2570    | -0.3987      | 7.08E-06        | Quantitative | NA               |
| 19:52739090               | 10       | 0.1094 | 0.9866     | 2.2130    | -3.5300      | 2.44E-06        | MEDsplit     | ANT              |

**Abbreviations and symbols:**

†Genome build: NCBI build 36.

EAF: effect allele frequency

$\beta_G$  is the genetic main effect

$\beta_{GE}$  is the GxPA interaction effect

$P_{\beta_{GE}}$  is the 1-DF test  $P$ -value

Effect direction: based on the similarity in the direction of  $\beta_G$

and the sum of  $\beta_G$  and  $\beta_{GE}$  to get an estimate of beta for the exposed group

SYN indicates same effect direction between exposure groups

ANT indicates opposite effect direction between exposure groups

Table S4. Top SNP hits for DBP detected using 2 DF joint test in all four analyses defined by PA variable. Significant hit at threshold of  $P \leq 5 \times 10^{-8}$  in bold.

| Chr:Position <sup>†</sup> | Loci Tag | EAF    | Imputation | $\beta_G$ | $\beta_{GE}$ | $P_{\beta_{GE}}$ | Joint 2-DF | PA variable  | Effect direction |
|---------------------------|----------|--------|------------|-----------|--------------|------------------|------------|--------------|------------------|
| 2:118667087               | 6        | 0.9247 | 0.7308     | -1.2450   | 2.7230       | 5.27E-07         | 2.51E-06   | MEDsplit     | ANT              |
| 2:25474404                | 5        | 0.7346 | 0.9786     | -0.6980   | -0.1155      | 7.28E-01         | 4.72E-06   | LQsplit      | SYN              |
| 2:25474404                | 5        | 0.7346 | 0.9786     | -0.5615   | -0.3410      | 2.48E-01         | 2.30E-06   | MEDsplit     | SYN              |
| 2:25474404                | 5        | 0.7346 | 0.9786     | -0.8520   | 0.0193       | 5.66E-01         | 4.28E-06   | Quantitative | NA               |
| 3:64324928                | 11       | 0.1721 | 0.3103     | 2.1870    | -0.3231      | 1.01E-06         | 6.35E-06   | Quantitative | NA               |
| 3:85454090                | 8        | 0.5263 | 1.0039     | 0.2553    | -1.3020      | 2.00E-06         | 7.99E-06   | LQsplit      | ANT              |
| 3:85454090                | 8        | 0.5216 | 1.0039     | 0.5050    | -0.7458      | 1.49E-06         | 4.46E-06   | SIEE         | ANT              |
| 6:33398525                | 12       | 0.5016 | 0.9764     | -0.4698   | 1.1920       | 2.47E-06         | 6.44E-06   | MEDsplit     | ANT              |
| 6:36351472                | 10       | 0.2535 | 0.9864     | -0.8762   | 0.8814       | 8.25E-07         | 5.12E-06   | SIEE         | ANT              |
| 7:11418729                | 2        | 0.6360 | 0.9754     | 0.9183    | -1.1980      | 4.10E-06         | 1.58E-06   | MEDsplit     | ANT              |
| 8:29307602                | 4        | 0.0521 | 0.6711     | -1.1900   | -1.3260      | 6.69E-02         | 1.86E-06   | LQsplit      | SYN              |
| 10:8828265                | 7        | 0.0762 | 0.4406     | -1.0660   | 0.3404       | 8.29E-05         | 2.76E-06   | Quantitative | NA               |
| 12:646358                 | 9        | 0.1710 | 0.9624     | -1.4340   | 0.1805       | 5.07E-06         | 4.86E-06   | Quantitative | NA               |
| 13:47846570               | 3        | 0.2595 | 0.9863     | 0.4536    | -0.8531      | 2.02E-06         | 1.81E-06   | SIEE         | ANT              |
| 18:13477861               | 13       | 0.8419 | 0.5154     | -0.7617   | 1.2640       | 7.57E-06         | 8.96E-06   | SIEE         | ANT              |
| <b>21:46484473</b>        | 1        | 0.6957 | 0.9903     | -1.0380   | 1.5830       | 6.48E-09         | 1.52E-08   | MEDsplit     | ANT              |
| 21:46484473               | 1        | 0.6970 | 0.9903     | -1.1930   | 0.8155       | 1.18E-06         | 4.44E-07   | SIEE         | SYN              |
| <b>21:46484473</b>        | 1        | 0.6957 | 0.9903     | 0.9487    | -0.1884      | 1.07E-08         | 2.63E-08   | Quantitative | NA               |

**Abbreviations and symbols:**

<sup>†</sup>Genome build: NCBI build 36.

EAF: effect allele frequency

$\beta_G$  is the genetic main effect

$\beta_{GE}$  is the GxPA interaction effect

$P_{\beta_{GE}}$  is the 1-DF test  $P$ -value

Joint 2-DF refers to  $P$ -values from the Wald 2-DF joint test for  $\beta_G$  and  $\beta_{GE}$

Effect direction: based on the similarity in the direction of  $\beta_G$

and the sum of  $\beta_G$  and  $\beta_{GE}$  to get an estimate of beta for the exposed group



SYN indicates same effect direction between exposure groups

ANT indicates opposite effect direction between exposure groups

Table S5. Top SNP hits for DBP detected using 1 DF interaction test in all four analyses defined by PA variable. Significant hit at threshold of  $P \leq 5 \times 10^{-8}$  in bold.

| Chr:Position <sup>†</sup> | Loci Tag | EAF   | Imputation | $\beta_G$ | $\beta_{GE}$ | $P_{\beta_{GE}}$ | PA variable  | Effect direction |
|---------------------------|----------|-------|------------|-----------|--------------|------------------|--------------|------------------|
| 1:63897567                | 16       | 0.223 | 0.989      | 0.577     | -0.857       | 5.50E-06         | SIEE         | ANT              |
| 1:63897660                | 16       | 0.227 | 0.989      | -1.128    | 0.158        | 8.34E-06         | Quantitative | NA               |
| 1:71550136                | 9        | 0.192 | 0.967      | 0.522     | -1.586       | 3.37E-06         | LQsplit      | ANT              |
| 2:118667087               | 2        | 0.925 | 0.731      | -1.245    | 2.723        | 5.27E-07         | MEDsplit     | ANT              |
| 2:9914074                 | 21       | 0.163 | 0.998      | 0.961     | -0.168       | 7.69E-06         | Quantitative | NA               |
| 3:64324928                | 4        | 0.172 | 0.310      | -1.196    | 2.655        | 9.00E-06         | MEDsplit     | ANT              |
| 3:64324928                | 4        | 0.172 | 0.310      | 2.187     | -0.323       | 1.01E-06         | Quantitative | NA               |
| 3:85454090                | 5        | 0.526 | 1.004      | 0.255     | -1.302       | 2.00E-06         | LQsplit      | ANT              |
| 3:85454090                | 5        | 0.522 | 1.004      | 0.505     | -0.746       | 1.49E-06         | SIEE         | ANT              |
| 3:99639402                | 24       | 0.558 | 0.873      | -0.812    | 0.132        | 9.15E-06         | Quantitative | NA               |
| 4:125514882               | 19       | 0.710 | 0.665      | -0.730    | 1.522        | 7.41E-06         | MEDsplit     | ANT              |
| 4:181903298               | 17       | 0.103 | 0.974      | -1.125    | 0.209        | 6.05E-06         | Quantitative | NA               |
| 4:34911652                | 23       | 0.817 | 0.845      | -1.243    | 0.175        | 8.81E-06         | Quantitative | NA               |
| 4:38025631                | 13       | 0.115 | 0.915      | -1.304    | 1.167        | 4.78E-06         | SIEE         | SYN              |
| 5:113072300               | 8        | 0.077 | 0.843      | 1.426     | -0.232       | 3.08E-06         | Quantitative | NA               |
| 6:33366421                | 7        | 0.507 | 0.974      | -0.489    | 1.204        | 1.97E-06         | MEDsplit     | ANT              |
| 6:36351472                | 3        | 0.254 | 0.986      | -0.876    | 0.881        | 8.25E-07         | SIEE         | ANT              |
| 6:7417981                 | 26       | 0.073 | 0.755      | 1.848     | -0.284       | 9.40E-06         | Quantitative | NA               |
| 7:11411026                | 12       | 0.629 | 0.922      | 0.875     | -1.217       | 4.03E-06         | MEDsplit     | ANT              |
| 7:155835300               | 10       | 0.645 | 0.565      | 0.878     | -1.619       | 3.59E-06         | MEDsplit     | ANT              |
| 7:93067389                | 27       | 0.575 | 0.988      | -0.667    | 0.131        | 9.44E-06         | Quantitative | NA               |
| 9:135834384               | 25       | 0.557 | 0.771      | -0.979    | 0.141        | 9.17E-06         | Quantitative | NA               |
| 9:14819767                | 18       | 0.287 | 0.436      | 0.770     | -2.102       | 6.20E-06         | LQsplit      | ANT              |
| 11:40180006               | 14       | 0.949 | 0.680      | 1.475     | -3.109       | 4.81E-06         | MEDsplit     | ANT              |
| 11:7951172                | 22       | 0.919 | 0.911      | -1.453    | 1.352        | 8.16E-06         | SIEE         | SYN              |
| 12:653611                 | 15       | 0.169 | 0.950      | -1.436    | 0.182        | 5.00E-06         | Quantitative | NA               |
| 13:47872743               | 6        | 0.263 | 0.985      | 0.485     | -0.851       | 1.92E-06         | SIEE         | ANT              |
| 14:54249771               | 11       | 0.809 | 0.916      | 0.694     | -1.485       | 3.85E-06         | MEDsplit     | ANT              |
| 18:13477861               | 20       | 0.842 | 0.515      | -0.762    | 1.264        | 7.57E-06         | SIEE         | ANT              |

| Chr:Position <sup>†</sup> | Loci Tag | EAF   | Imputation | $\beta_G$ | $\beta_{GE}$ | $P_{\beta_{GE}}$ | PA variable  | Effect direction |
|---------------------------|----------|-------|------------|-----------|--------------|------------------|--------------|------------------|
| 21:46479105               | 1        | 0.557 | 0.982      | 0.837     | -0.772       | 7.46E-07         | SIEE         | SYN              |
| <b>21:46484473</b>        | 1        | 0.696 | 0.990      | -1.038    | 1.583        | 6.48E-09         | MEDsplit     | ANT              |
| <b>21:46484473</b>        | 1        | 0.696 | 0.990      | 0.949     | -0.188       | 1.07E-08         | Quantitative | NA               |

**Abbreviations and symbols:**

<sup>†</sup>Genome build: NCBI build 36.

EAF: effect allele frequency

$\beta_G$  is the genetic main effect

$\beta_{GE}$  is the GxPA interaction effect

$P_{\beta_{GE}}$  is the 1-DF test *P*-value

Effect direction: based on the similarity in the direction of  $\beta_G$

and the sum of  $\beta_G$  and  $\beta_{GE}$  to get an estimate of beta for the exposed group

SYN indicates same effect direction between exposure groups

ANT indicates opposite effect direction between exposure groups

Table S6. Overlap in genetic loci detected by gene-physical activity interaction (GxPA) analysis that differed in physical activity (PA) variable using the 1 DF interaction test. Overlap is the sum of loci detected by at least two different GxPA analyses that differed in PA variable.

| Phenotype | PA variable  | Total | Unique | Overlap including | Overlap with     |
|-----------|--------------|-------|--------|-------------------|------------------|
|           |              |       |        | Quantitative      | dichotomous only |
| SBP       | Quantitative | 9     | 4      | NA                | 5                |
|           | LQsplit      | 6     | 4      | 0                 | 2                |
|           | MEDsplit     | 9     | 4      | 4                 | 1                |
|           | SIEE         | 8     | 3      | 3                 | 2                |
| DBP       | Quantitative | 12    | 9      | NA                | 3                |
|           | LQsplit      | 3     | 2      | 0                 | 1                |
|           | MEDsplit     | 9     | 7      | 2                 | 0                |
|           | SIEE         | 8     | 5      | 2                 | 1                |

**Abbreviations:** SBP, systolic blood pressure; DBP, diastolic blood pressure;  
LQsplit, created by splitting Quantitative by the lower quartile of its distribution;  
MEDsplit, created by splitting Quantitative by the median of its distribution;  
SIEE, created by selecting individuals with Quantitative values in the lower and upper quartiles and excluding individuals intermediate between the lower and upper quartile.
